# Supplementary material
Source: PubMed Central journal article supplement (PMC2875810)

Fig. S1. Dynamic changes of *Egfr* mRNA in mural granulosa cells (MGC) and cumulus-oocyte complexes (COC). MGC and COC were isolated from eCG-primed mice at various time points after hCG injection, and the levels of *Egfr* mRNA was quantified by real-time RT-PCR. Levels of *Egfr* mRNA are presented as relative to hCG 0-h group in left (MGC) and middle (COC) panels. In panel C, levels of *Egfr* mRNA are presented as the ratio of MGC to COC.

Figure S1

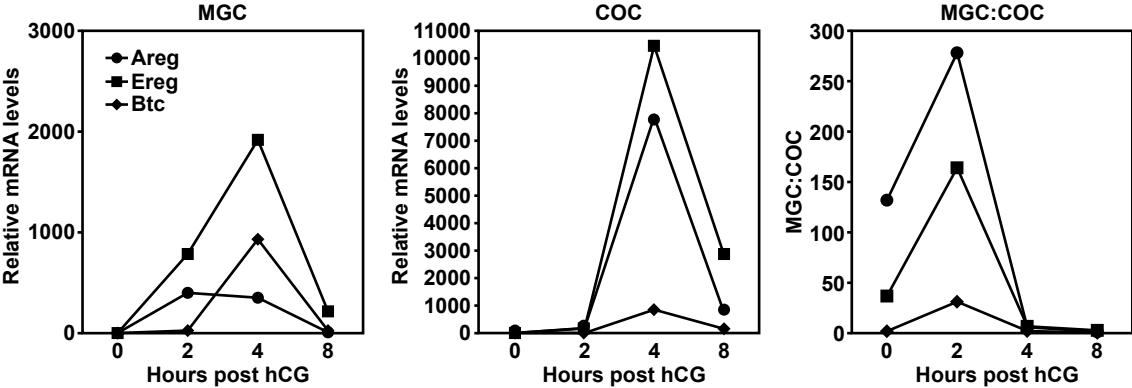

Supplement: me.2009-0497_1.pdf [file me.2009-0497_1.pdf]
